# Supplementary material for: Age-Related Changes in Gut Microbiota Alter Phenotype of Muscularis Macrophages and Disrupt Gastrointestinal Motility
Source: PubMed Central journal article supplement — Cell Mol Gastroenterol Hepatol. 2018 Sep 17;7(1):243–245.e2. doi: 10.1016/j.jcmgh.2018.09.001 (PMC6305843; doi:10.1016/j.jcmgh.2018.09.001), 2018-09-17
Supplement: mmc1.pdf [file mmc1.pdf]

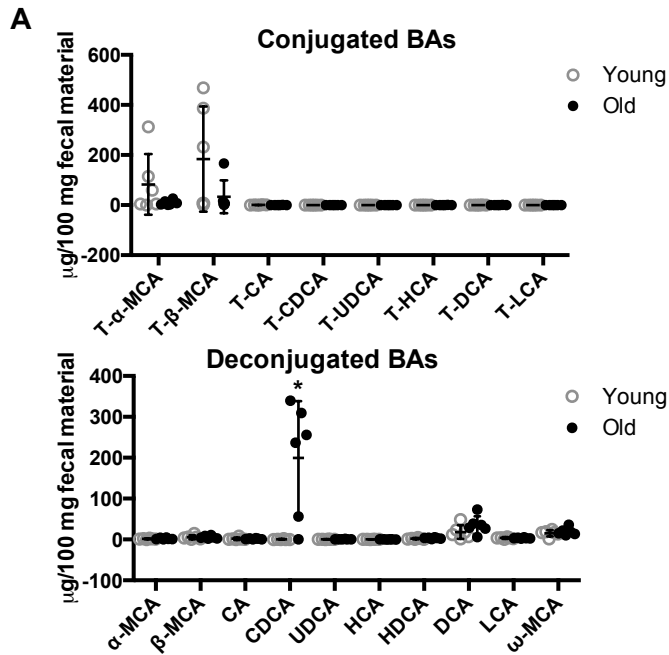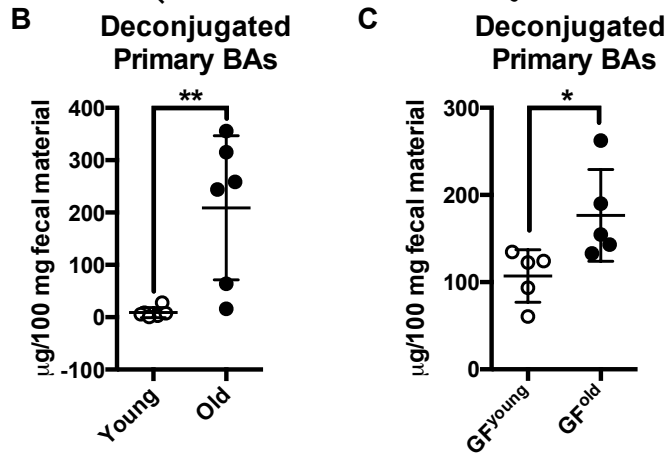

**Supplemental Figure 1. Stool from old mice contain higher deconjugated bile acids.** Targeted metabolomics profiling of bile acids (BAs) revealed stool from old mice to contain greater deconjugated BAs, particularly CDCA, compared to young (A). Stool from old mice contained nearly 20-fold greater deconjugated primary BAs (B), a trend that was also observed in stool from GF<sup>old</sup> compared to GF<sup>young</sup> mice (C).  $n \geq 5$  for all groups, \* $p < .05$ , \*\* $p < .01$  by t-test. Data are represented as mean  $\pm$  SD.  $\alpha$ -muricholic acid ( $\alpha$ -MCA),  $\beta$ -muricholic acid ( $\beta$ -MCA), cholic acid (CA), chenodeoxycholic acid (CDCA), ursodeoxycholic acid (UDCA), hyocholic acid (HCA), hyodeoxycholic acid (HDCA), deoxycholic acid (DCA), lithocholic acid (LCA),  $\omega$ -muricholic acid ( $\omega$ -MCA), tauro- $\alpha$ -muricholic acid (T- $\alpha$ -MCA), tauro- $\beta$ -muricholic acid (T- $\beta$ -MCA), taurocholic acid (T-CA), taurochenodeoxycholic acid (T-CDCA), tauroursodeoxycholic acid (T-UDCA), taurohyocholic acid (T-HCA), taurodeoxycholic acid (T-DCA), tauroolithocholic acid (T-LCA).
